# Supplementary material
Source: Frontiers journal article supplement (https://www.frontiersin.org/articles/11588)
Supplement: Data_Sheet_1.XLSX [file Data_Sheet_1.XLSX]

## Sheet: Lipid Data
Synonym	elemental composition	RT	M+H	M+NH4	M+Na	M-H	M+Ace-H	Intensity M+H	Intensity M+NH4	Intensity M+Na	Intensity M-H	Intensity M+Acetate-H
PC 32:0	C40H80NO8P	9.41	734.569	751.596	756.551	732.555	792.576	390000	x	193000	x	25700
PC 34:1	C42H82NO8P	9.79	760.585	777.612	782.567	758.571	818.592	7720000	x	2630000	x	727000
PC 34:2	C42H80NO8P	9.05	758.569	775.596	780.551	756.555	816.576	73000000	x	13000000	x	5200000
PC 34:3	C42H78NO8P	8.39	756.554	773.58	778.536	754.539	814.56	80000000	x	10500000	x	7020000
PC 34:4	C42H76NO8P	7.85	754.538	771.565	776.52	752.524	812.545	3.84	x	330000	x	41000
PC 34:5	C42H74NO8P	7.31	752.522	769.549	774.504	750.508	810.529	1220000	x	218000	x	148000
PC 34:6	C42H72NO8P	6.8	750.507	767.533	772.489	748.492	808.513	8390000	x	2830000	x	680000
PC 36:1	C44H86NO8P	10.98	788.616	805.643	810.598	786.602	846.623	475000	x	106000	x	43100
PC 36:2	C44H84NO8P	10.19	786.601	803.627	808.583	784.586	844.607	4860000	x	1190000	x	390000
PC 36:3	C44H82NO8P	9.36	784.585	801.612	806.567	782.571	842.592	10700000	x	2890000	x	661000
PC 36:3	C44H82NO8P	9.51	784.585	801.612	806.567	782.571	842.592	11000000	x	2950000	x	665000
PC 36:4	C44H80NO8P	8.66	782.569	799.596	804.551	780.555	840.576	48000000	x	10200000	x	3520000
PC 36:5	C44H78NO8P	8.04	780.554	797.58	802.536	778.539	838.56	110000000	x	11000000	x	6970000
PC 36:6	C44H76NO8P	7.49	778.538	795.565	800.52	776.524	836.545	92400000	x	12900000	x	68900000
PC 38:2	C46H88NO8P	11.47	814.632	831.659	836.614	812.617	872.639	153000	x	x	x	x
PC 38:3	C46H86NO8P	10.72	812.616	829.643	834.598	810.602	870.623	147000	x	x	x	weak
PC 38:4	C46H84NO8P	9.74	810.601	827.627	832.583	808.586	868.607	429000	x	95500	x	39100
PC 38:5	C46H82NO8P	8.96	808.585	825.612	830.567	806.571	866.592	1140000	x	351000	x	80000
PC 38:6	C46H80NO8P	8.34	806.569	823.596	828.551	804.555	864.576	645000	x	145000	x	36400
PC 40:1	C48H94NO8P	11.89	844.679	861.706	866.661	842.664	902.686	1120000	x	1370000	x	669000
PC 40:2	C48H92NO8P	10.76	842.663	859.69	864.645	840.649	900.67	3080000	x	4200000	x	207000
PC 40:3	C48H90NO8P	9.92	840.648	857.674	862.63	838.633	898.654	29800	x	43300	x	21300
PE 34:1	C39H76NO8P	9.87	718.538	735.565	740.52	716.524	776.545	785000	x	157000	850000	x
PE 34:2	C39H74NO8P	9.11	716.522	733.549	738.504	714.508	774.529	14200000	x	1830000	6150000	x
PE 34:3	C39H72NO8P	8.5	714.507	731.533	736.489	712.492	772.513	10900000	x	1110000	4640000	x
PE 34:4	C39H70NO8P	7.93	712.491	729.518	734.473	710.477	770.498	100000	x	x	44800	x
PE 34:5	C39H68NO8P	7.35	710.476	727.502	732.457	708.461	768.482	38800	x	5530	10800	x
PE 34:6	C39H66NO8P	6.84	708.46	725.486	730.442	706.445	766.466	338000	x	67700	105000	x
PE 36:1	C41H80NO8P	11.02	746.569	763.596	768.551	744.555	804.576	31600	x	4730	12100	x
PE 36:2	C41H78NO8P	10.2	744.554	761.58	766.536	742.539	802.56	756000	x	135000	308000	x
PE 36:3	C41H76NO8P	9.42	742.538	759.565	764.52	740.524	800.545	1100000	x	190000	386000	x
PE 36:3	C41H76NO8P	9.58	742.538	759.565	764.52	740.524	800.545	1100000	x	195000	389000	x
PE 36:4	C41H74NO8P	8.73	740.522	757.549	762.504	738.508	798.529	8470000	x	1100000	3330000	x
PE 36:5	C41H72NO8P	8.1	738.507	755.533	760.489	736.492	796.513	8170000	x	550000	3180000	x
PE 36:6	C41H70NO8P	7.56	736.491	753.518	758.473	734.477	794.498	5410000	x	759000	2710000	x
PE 38:2	C43H82NO8P	11.54	772.585	789.612	794.567	770.571	830.592	392000	x	63700	53900	x
PE 38:3	C43H80NO8P	10.8	770.569	787.596	792.551	768.555	828.576	105000	x	22800	43700	x
PE 38:4	C43H78NO8P	9.71	768.554	785.58	790.536	766.539	826.56	87600	x	10300	21800	x
PE 38:5	C43H76NO8P	9.05	766.538	783.565	788.52	764.524	824.545	129000	x	x	55700	x
PE 40:2	C45H86NO8P	12.82	800.616	817.643	822.598	798.602	858.623	318000	x	46200	116000	x
PE 40:3	C45H84NO8P	12.09	798.601	815.627	820.583	796.586	856.607	139000	x	47300	80400	x
PE 42:2	C47H90NO8P	14.01	828.648	845.674	850.63	826.633	886.654	550000	x	127000	250000	x
PE 42:3	C47H88NO8P	13.4	826.632	843.659	848.614	824.617	884.639	367000	x	53500	105000	x
PE 42:4	C47H86NO8P	12.16	824.616	841.643	846.598	822.602	882.623	212000	x	46300	84000	x
PG 32:0	C38H75O10P	8.27	723.517	740.544	745.499	721.503	781.524	x	1140000	539000	2550000	x
PG 32:1	C38H73O10P	8	721.501	738.528	743.483	719.487	779.508	x	1160000	449000	2890000	x
PG 34:0	C40H79O10P	9.27	751.548	768.575	773.53	749.534	809.555	x	155000	100000	308000	x
PG 34:1	C40H77O10P	8.56	749.533	766.559	771.515	747.518	807.539	236000	809000	361000	1350000	x
PG 34:2	C40H75O10P	7.96	747.517	764.544	769.499	745.503	805.524	1610000	4360000	1730000	6820000	x
PG 34:3	C40H73O10P	7.39	745.501	762.528	767.483	743.487	803.508	5250000	15600000	3050000	25000000	x
PG 34:4	C40H71O10P	7.17	743.486	760.512	765.468	741.471	801.492	6610000	17900000	31800000	29400000	x
PG 34:5	C40H69O10P	6.65	741.47	758.497	763.452	739.456	799.477	x	69800	24600	70900	x
PG 34:5	C40H69O10P	6.79	741.47	758.497	763.452	739.456	799.477	x	85700	33700	98500	x
PG 34:6	C40H67O10P	6.13	739.454	756.481	761.436	737.44	797.461	x	40200	x	43500	x
PI 34:1	C43H81O13P	8.45	837.549	854.575	859.531	835.534	895.555	125000	233000	x	233000	x
PI 34:2	C43H79O13P	7.85	835.533	852.56	857.515	833.519	893.54	1660000	3450000	x	46000000	x
PI 34:3	C43H77O13P	7.33	833.517	850.544	855.499	831.503	891.524	2890000	6490000	x	23600000	x
PI 34:4	C43H75O13P	6.88	831.502	848.528	853.484	829.487	889.508	x	60200	x	90600	x
PI 36:1	C45H85O13P	9.48	865.58	882.607	887.562	863.566	923.587	x	1700	x	20000	x
PI 36:2	C45H83O13P	8.8	863.564	880.591	885.546	861.55	921.571	x	201000	x	335000	x
PI 36:3	C45H81O13P	8.22	861.549	878.575	883.531	859.534	919.555	61300	179000	x	385000	x
PI 36:4	C45H79O13P	7.53	859.533	876.56	881.515	857.519	917.54	x	133000	x	286000	x
PI 36:5	C45H77O13P	7.02	857.517	874.544	879.499	855.503	915.524	188000	461000	x	462000	x
PI 36:6	C45H75O13P	6.6	855.502	872.528	877.484	853.487	913.508	x	778000	x	892000	x
PS 34:2	C40H74NO10P	7.97	760.512	671.466	782.494	758.498	818.519	326000	x	x	108000	x
PS 34:3	C40H72NO10P	7.44	758.497	669.45	780.479	756.482	816.503	364000	x	x	83300	x
PS 36:2	C42H78NO10P	8.99	788.544	699.497	810.526	786.529	846.55	98900	x	x	28900	x
PS 36:3	C42H76NO10P	8.43	786.528	697.481	808.51	784.513	844.535	161000	x	x	45400	x
PS 38:2	C44H82NO10P	10.14	816.575	727.528	838.557	814.56	874.581	63700	x	x	35500	x
PS 38:3	C44H80NO10P	9.48	814.559	725.513	836.541	812.545	872.566	115000	x	x	45700	x
PS 40:2	C46H86NO10P	11.33	844.606	755.56	866.588	842.592	902.613	328000	x	x	54000	x
PS 40:3	C46H84NO10P	10.69	842.591	753.544	864.572	840.576	900.597	97200	x	x	57200	x
PS 42:2	C48H90NO10P	12.61	872.638	783.591	894.619	870.623	930.644	100000	x	x	62000	x
PS 42:3	C48H88NO10P	11.9	870.622	781.575	892.604	868.607	928.628	147000	x	x	94800	x
PS 42:4	C48H86NO10P	10.72	868.606	779.56	890.588	866.592	926.613	101000	x	x	50300	x
PS 44:2	C50H94NO10P	13.95	900.669	811.622	922.651	898.654	958.675	8710	x	x	3220	x
PS 44:3	C50H92NO10P	13.37	898.653	809.607	920.635	896.639	956.66	4220	x	x	2870	x
MGDG 34:1	C43H80O10	10.2	757.582	774.609	779.564	755.568	815.589	x	89600	268000	x	52300
MGDG 34:2	C43H78O10	9.43	755.567	772.593	777.549	753.552	813.573	x	227000	873000	x	135000
MGDG 34:3	C43H76O10	8.8	753.551	770.578	775.533	751.537	811.558	x	2820000	8480000	x	1350000
MGDG 34:4	C43H74O10	8.18	751.535	768.562	773.517	749.521	809.542	x	2170000	3940000	x	993000
MGDG 34:5	C43H72O10	7.6	749.52	766.546	771.502	747.505	807.526	x	4820000	10700000	x	2370000
MGDG 34:6	C43H70O10	7.04	747.504	764.531	769.486	745.49	805.511	x	138000000	39200000	x	96400000
MGDG 36:3	C45H80O10	9.9	781.582	798.609	803.564	779.568	839.589	x	246000	351000	x	63800
MGDG 36:4	C45H78O10	9.01	779.567	796.593	801.549	777.552	837.573	x	819000	892000	x	545000
MGDG 36:5	C45H76O10	8.35	777.551	794.578	799.533	775.537	835.558	x	2080000	4680000	x	2350000
MGDG 36:6	C45H74O10	7.77	775.535	792.562	797.517	773.521	833.542	x	1100000	2580000	x	2010000
MGDG 36:6	C45H74O10	7.92	775.535	792.562	797.517	773.521	833.542	x	1040000	2510000	x	1950000
MGDG 38:4	C47H82O10	10.24	807.598	824.625	829.58	805.584	865.605	x	39100	150000	x	30700
MGDG 38:5	C47H80O10	9.37	805.582	822.609	827.564	803.568	863.589	x	x	119000	x	19500
MGDG 38:6	C47H78O10	8.71	803.567	820.593	825.549	801.552	861.573	x	22800	348000	x	110000
DGDG 34:1	C49H90O15	9.41	919.635	936.662	941.617	917.621	977.642	x	770000	1970000	x	303000
DGDG 34:2	C49H88O15	8.72	917.62	934.646	939.602	915.605	975.626	x	2780000	6950000	x	1170000
DGDG 34:3	C49H86O15	8.14	915.604	932.63	937.586	913.589	973.611	x	12700000	24500000	x	7750000
DGDG 34:4	C49H84O15	7.52	913.588	930.615	935.57	911.574	971.595	x	235000	642000	x	121000
DGDG 34:5	C49H82O15	7.02	911.573	928.599	933.555	909.558	969.579	x	374000	258000	x	349000
DGDG 34:6	C49H80O15	6.71	909.557	926.584	931.539	907.542	967.564	x	13600000	22300000	x	7570000
DGDG 36:2	C51H92O15	9.83	945.651	962.677	967.633	943.636	1003.66	x	x	144000	x	17100
DGDG 36:3	C51H90O15	9.17	943.635	960.662	965.617	941.621	1001.64	x	549000	2990000	x	271000
DGDG 36:4	C51H88O15	8.35	941.62	958.646	963.602	939.605	999.626	x	1090000	2350000	x	407000
DGDG 36:5	C51H86O15	7.78	939.604	956.63	961.586	937.589	997.611	x	705000	932000	x	611000
DGDG 36:6	C51H84O15	7.26	937.588	954.615	959.57	935.574	995.595	x	58900000	48600000	x	52600000
DGDG 38:3	C53H94O15	10.35	971.667	988.693	993.649	969.652	1029.67	x	9380	31700	x	7100
DGDG 38:4	C53H92O15	9.44	969.651	986.677	991.633	967.636	1027.66	x	12200	32700	x	6080
DGDG 38:5	C53H90O15	8.64	967.635	984.662	989.617	965.621	1025.64	x	58500	99000	x	23200
DGDG 38:6	C53H88O15	8.08	965.62	982.646	987.602	963.605	1023.63	x	536000	430000	x	173000
LysoPC 16:0	C24H50NO7P	4.25	496.34	513.366	518.322	494.325	554.346	399000	x	x	x	x
LysoPC 18:0	C26H54NO7P	4.97	524.371	541.398	546.353	522.357	582.378	39600	x	x	x	x
LysoPC 18:1	C26H52NO7P	4.32	522.355	539.382	544.337	520.341	580.362	25600	x	x	x	x
LysoPC 18:2	C26H50NO7P	3.81	520.34	537.366	542.322	518.325	578.346	189000	x	x	x	x
LysoPC 18:2	C26H50NO7P	3.91	520.34	537.366	542.322	518.325	578.346	159000	x	x	x	x
LysoPC 18:3	C26H48NO7P	3.34	518.324	535.351	540.306	516.31	576.331	232000	x	x	x	x
LysoPC 18:3	C26H48NO7P	3.52	518.324	535.351	540.306	516.31	576.331	167000	x	x	x	x
LysoPE 16:0	C21H44NO7P	4.3	454.293	471.319	476.275	452.278	512.299	151000	x	x	58100	x
LysoPE 18:1	C23H46NO7P	4.49	480.308	497.335	502.29	478.294	538.315	9510	x	x	3390	x
LysoPE 18:2	C23H44NO7P	3.88	478.293	495.319	500.275	476.278	536.299	40700	x	x	15200	x
LysoPE 18:2	C23H44NO7P	4.03	478.293	495.319	500.275	476.278	536.299	90900	x	x	31100	x
LysoPE 18:3	C23H42NO7P	3.4	476.277	493.304	498.259	474.263	534.284	25300	x	x	10800	x
LysoPE 18:3	C23H42NO7P	3.57	476.277	493.304	498.259	474.263	534.284	55400	x	x	20100	x
lysoPG 16:0	C22H45PO9	3.86	485.287	502.314	507.269	483.273	543.294	10400	x	x	16900	x
lysoPG 16:0	C22H45PO9	3.69	485.287	502.314	507.269	483.273	543.294	10400	x	x	16900	x
lysoPG 16:1	C22H43PO9	3.47	483.272	500.298	505.254	481.257	541.278	8360	x	x	21100	x
lysoPG 18:2	C24H45PO9	7.68	509.287	526.314	531.269	507.273	567.294	x	x	x	10400	x
lysoPG 18:3	C24H43PO9	7.15	507.272	524.298	529.254	505.257	565.278	35400	x	x	161000	x
Cer d18:0/h16:0	C34H69NO4	8.96	556.53	573.556	578.512	554.515	614.537	48800	x	x	116000	43300
Cer d18:0/c16:0	C34H69NO3	9.43	540.535	557.562	562.517	538.52	598.542	20500	x	x	14000	4500
Cer d18:0/h22:0	C40H81NO4	12.1	640.624	657.65	662.606	638.609	698.63	14100	x	18000	8540	17000
Cer d18:0/h24:0	C42H85NO4	13.43	668.655	685.682	690.637	666.641	726.662	86500	x	105000	60000	94300
Cer d18:1/h24:1	C42H81NO4	11.79	664.624	681.65	686.606	662.609	722.63	133000	x	115000	79700	117000
Cer d18:1/h26:1	C44H85NO4	13.07	692.655	709.682	714.637	690.641	750.662	52400	x	74400	32000	57700
Cer d18:1/h26:0	C44H87NO4	14.1	694.671	711.697	716.653	692.656	752.677	268000	x	280000	161000	287000
Cer t18:0/h22:0	C40H81NO5	11.53	656.619	673.645	678.601	654.604	714.625	2120	x	12000	6350	7040
Cer t18:0/c24:0	C42H83NO4	12.2	666.639	683.666	688.621	664.625	724.646	58500	x	73000	37700	65800
Cer t18:0/h24:0	C42H85NO5	12.87	684.65	701.677	706.632	682.635	742.657	5830	x	39300	59300	19800
Cer t18:0/h26:0	C44H89NO5	14	712.681	729.708	734.663	710.667	770.688	15400	x	15600	22100	13400
Cer t18:0/c26:0	C44H89NO4	14.37	696.686	713.713	718.668	694.672	754.693	65400	x	66700	35000	82300
Cer t18:1/h16:0	C34H67NO5	7.74	570.509	587.536	592.491	568.495	628.516	146000	x	82400	804000	137000
Cer t18:1/h22:0	C40H79NO5	11.09	654.603	671.63	676.585	652.589	712.61	120000	x	587000	226000	55900
Cer t18:1/h20:0	C42H81NO5	11.14	654.603	671.63	676.585	652.589	712.61	91900	x	114000	235000	61100
Cer t18:1/h24:1	C40H79NO4	11.29	680.619	697.645	702.601	678.604	738.625	1000000	x	519000	1970000	530000
Cer t18:1/c22:0	C42H83NO5	11.64	638.608	655.635	660.59	636.594	696.615	40400	x	39300	25200	32000
Cer t18:1/h24:0	C44H85NO5	12.46	682.634	699.661	704.616	680.62	740.641	214000	x	219000	473000	157000
Cer t18:1/h26:1	C44H87NO5	12.54	708.65	725.677	730.632	706.635	766.657	27800	x	36400	67700	x
Cer t18:1/c24:0	C42H83NO4	12.97	666.639	683.666	688.621	664.625	724.646	179000	x	250000	132000	210000
Cer t18:0/c26:1	C44H87NO4	13.55	694.671	711.697	716.653	692.656	752.677	259000	x	278000	137000	266000
Cer t18:1/h26:0	C44H89NO5	13.74	710.666	727.692	732.648	708.651	768.672	59900	x	82000	132000	42300
GlcCer d18:1/h16:0	C40H77NO9	8	716.567	733.594	738.549	714.553	774.574	1160000	x	x	1680000	918000
GlcCer d18:1/h24:1	C48H91NO9	11.58	826.677	843.703	848.659	824.662	884.683	207000	x	195000	69500	57400
GlcCer t18:1/h16:0	C40H77NO10	7.38	732.562	749.589	754.544	730.547	790.569	1560000	x	491000	1110000	376000
GlcCer t18:1/h20:0	C44H85NO10	9.4	788.625	805.651	810.607	786.61	846.631	65300	x	76600	106000	35900
GlcCer t18:1/h22:0	C46H89NO10	10.64	816.656	833.682	838.638	814.641	874.663	432000	x	391000	313000	166000
GlcCer t18:1/h24:1	C48H91NO10	10.78	842.672	859.698	864.654	840.657	900.678	2750000	x	3740000	3750000	1810000
GlcCer t18:1/h24:0	C48H93NO10	11.9	844.687	861.714	866.669	842.673	902.694	140000	x	1750000	1750000	813000
GlcCer t18:1/h26:1	C50H95NO10	11.99	870.703	887.729	892.685	868.688	928.709	241000	x	324000	260000	141000
GlcCer t18:1/h26:0	C50H97NO10	13.2	872.719	889.745	894.7	870.704	930.725	295000	x	422000	422000	191000
GIPC t18:1/h16:0	C52H96NO24P	5.89	1150.61	1167.64	1172.6	1148.6	1208.62	135000	26900	71800	22600	x
GIPC t18:1/h24:1	C60H110NO24P	8.21	1260.72	1277.75	1282.7	1258.71	1318.73	201000	52700	42300	106000	x
GIPC t18:1/h24:0	C60H112NO24P	9.15	1262.74	1279.77	1284.72	1260.72	1320.75	181000	56700	11800	78100	x
GIPC t18:1/h26:0	C62H116NO24P	10.28	1290.77	1307.8	1312.75	1288.76	1348.78	33400	6550	31600	9760	x
GIPC t18:1/h22:0	C58H108NO24P	8.16	1234.71	1251.73	1256.69	1232.69	1292.71	51700	x	x	16700	x
PG OPDA/16:1	C40H69O11P	5.29	757.465	774.492	779.447	755.45	815.472	4160000	271000	1170000	2400000	x
PG OPDA/16:0	C40H71O11P	5.42	759.481	776.507	781.463	757.466	817.487	2160000	142000	627000	1090000	x
MGDG 18 C ketol/16:3	C43H70O12	4.96	779.494	796.521	801.476	777.479	837.501	x	1770000	6170000	964000	128000
MGDG 18 C ketol/dnOPDA	C43H68O13	2.99	793.473	810.5	815.455	791.459	851.48	45200	858000	1770000	48300	125000
MGDG 18:3/16 C ketol	C43H70O12	5.07	779.494	796.521	801.476	777.479	837.501	x	1590000	2700000	1340000	210000
MGDG 18:3/18 C ketol	C45H74O12	5.39	807.525	824.552	829.507	805.511	865.532	x	748000	1980000	452000	49200
MGDG 18:3/dnOPDA	C43H68O11	5.34	761.483	778.51	783.465	759.469	819.49	445000	22700000	9100000	168000	1360000
MGDG OPDA/16 C ketol	C43H68O13	3.12	793.473	810.5	815.455	791.459	851.48	45200	924000	2000000	525000	80300
MGDG OPDA/16:3	C43H68O11	5.08	761.483	778.51	783.465	759.469	819.49	2510000	6500000	214000000	752000	4100000
MGDG OPDA/18 C ketol	C45H72O13	3.67	821.505	838.531	843.487	819.49	879.511	x	333000	779000	221000	32300
MGDG OPDA/18:3	C45H72O11	5.52	789.515	806.541	811.497	787.5	847.521	628000	1640000	7150000	192000	1150000
MGDG OPDA/dnOPDA	C43H66O12	3.21	775.463	792.489	797.445	773.448	833.469	6330000	30600000	45000000	1810000	13300000
MGDG OPDA/OPDA	C45H70O12	3.79	803.494	820.521	825.476	801.479	861.501	1660000	10200000	17300000	559000	3730000
DGDG OPDA/18:3	C51H82O16	5.23	951.568	968.594	973.55	949.553	1009.57	49700	660000	744000	235000	134000
DGDG OPDA/18:3	C51H82O16	5.49	951.568	968.594	973.55	949.553	1009.57	49700	666000	754000	238000	141000
DGDG OPDA/OPDA	C51H80O17	3.44	965.547	982.573	987.529	963.532	1023.55	295000	3790000	5310000	407000	1190000
DGDG 18:3/18 C ketol	C51H84O17	5.12	969.578	986.605	991.56	967.564	1027.58	14400	413000	577000	186000	45100
DGDG OPDA/18 C ketol	C51H82O18	3.31	983.557	1000.58	1005.54	981.543	1041.56	x	137000	134000	66700	15400
SQDG 34:1	C43H80O12S	8.27	821.544	838.571	843.526	819.53	879.551	x	275000	45900	846000	x
SQDG 34:2	C43H78O12S	7.65	819.529	836.555	841.511	817.514	877.535	x	1130000	165000	1670000	x
SQDG 34:3	C43H76O12S	7.15	817.513	834.54	839.495	815.498	875.52	x	7390000	211000	27700000	x
SQDG 34:4	C43H74O12S	6.74	815.497	832.524	837.479	813.483	873.504	x	143000	30900	178000	x
SQDG 34:5	C43H72O12S	6.32	813.482	830.508	835.464	811.467	871.488	x	47700	14600	52500	x
SQDG 34:6	C43H70O12S	5.97	811.466	828.493	833.448	809.452	869.473	x	210000	37900	233000	x
SQDG 36:1	C45H84O12S	9.25	849.576	866.602	871.558	847.561	907.582	x	x	x	weak	x
SQDG 36:2	C45H82O12S	8.65	847.56	864.587	869.542	845.545	905.567	x	x	x	weak	x
SQDG 36:3	C45H80O12S	8.06	845.544	862.571	867.526	843.53	903.551	x	181000	x	245000	x
SQDG 36:4	C45H78O12S	7.45	843.529	860.555	865.511	841.514	901.535	x	222000	x	868000	x
SQDG 36:5	C45H76O12S	6.92	841.513	858.54	863.495	839.498	899.52	x	745000	134000	1220000	x
SQDG 36:6	C45H74O12S	6.45	839.497	856.524	861.479	837.483	897.504	x	6980000	664000	11900000	x

## Sheet: Abreviation
Abbreviation	Full Name	Class
MGDG	Mono-Galactosyl-Diacyl-Glycerol	Galactolipids
DGDG	Di-Galactosyl-Diacyl-Glycerol	Galactolipids
SQDG	Sulfoquinovosyl-Diacyl-Glycerol	Galactolipids
OPDA	Oxophytodienoicacid	Oxylipin
dnOPDA	dinorOxophytodienoicacid	Oxylipin
16C ketol	16 Carbon ketol acid	Oxylipin
18C ketol	18 Carbon ketol acid	Oxylipin
GlcCer	GlucosylCeroceramide	Sphingolipids
GIPC	GlycosylinositolphosphoCeramide	Sphingolipids
Cer	Ceramide	Sphingolipids
LCB	Long Chain Base	Sphingolipids
LCB_P	Long Chain Base Phosphate	Sphingolipids
d16:X or d18:X	The d stands for two (di) hydroxy groups on the LCB	Sphingolipids
t16:X or t18:X	The d stands for three (tri) hydroxy groups on the LCB	Sphingolipids
h16:X -h26:X	FA chain in the Sphingolipid is hydroxylated	Sphingolipids
c16:X -c26:X	FA chain in the Sphingolipid is not hydroxylated	Sphingolipids
PA	Phosphatidic Acid	Phospholycerols
PC	Phosphatidyl-Choline	Phospholycerolipids
PE	Phosphatidyl-Ethanolamine	Phospholycerolipids
PG	Phosphatidyl-Glycerol	Phospholycerolipids
PI	Phosphatidyl-Inositol	Phospholycerolipids
PS	Phosphatidyl-Serine	Phospholycerolipids
CL	Cardiolipin	Phospholycerolipids
TAG	Triacylglycerol	Glycerolipids
DAG	Diacylglycerol	Glycerolipids
FA	Fatty Acid	Fatty Acid
lyso PX (X = C, E, G)	Phospholipids which have lost one FA chain	Phospholycerolipids
CoQ	Ubiquinone	Other
